# Supplementary material for: DICER1 and microRNA regulation in post-traumatic stress disorder with comorbid depression
Source: PubMed Central journal article supplement (PMC4686835; doi:10.1038/ncomms10106), 2015-12-03
Supplement: ncomms10106-s1.pdf [file ncomms10106-s1.pdf]

**Supplementary Table 1:** Selected gene sets significantly enriched at FDR<0.05 among the genes differentially expressed between cases of PTSD&Dep and controls (at  $p<0.01$ ) from GSEA.

| Description of gene set                                                                                 | NES   | nominal $p$ | FDR $q$ -value |
|---------------------------------------------------------------------------------------------------------|-------|-------------|----------------|
| <b><i>microRNA related</i></b>                                                                          |       |             |                |
| Targets of microRNA GTGCCTT, MIR-506                                                                    | -2.94 | <2.00E-4    | 5.31E-5        |
| Targets of microRNA TGCTGCT, MIR-15A, MIR-16, MIR-15B, MIR-195, MIR-424, MIR-497                        | -2.84 | <2.00E-4    | 1.02E-4        |
| Targets of microRNA TTTGCAC, MIR-19A, MIR-19B                                                           | -2.60 | <2.00E-4    | 4.71E-4        |
| Targets of microRNA TGGTGCT, MIR-29A, MIR-29B, MIR-29C                                                  | -2.44 | <2.00E-4    | 1.19E-3        |
| Targets of microRNA AATGTGA, MIR-23A, MIR-23B                                                           | -2.34 | <2.00E-4    | 2.09E-3        |
| Targets of microRNA CTCAGGG, MIR-125B, MIR-125A                                                         | -2.33 | 4.08E-4     | 2.21E-3        |
| Targets of microRNA TGAATGT, MIR-181A, MIR-181B, MIR-181C, MIR-181D                                     | -2.31 | 1.63E-3     | 2.47E-3        |
| Targets of microRNA TTGCCAA, MIR-182                                                                    | -2.26 | 2.82E-3     | 3.45E-3        |
| Targets of microRNA GCACTTT, MIR-17-5P, MIR-20A, MIR-106A, MIR-106B, MIR-20B, MIR-519D                  | -2.20 | 1.60E-3     | 4.76E-3        |
| Targets of microRNA CTTTGTA, MIR-524                                                                    | -2.15 | 1.65E-3     | 6.23E-3        |
| Targets of microRNA TTGCACT, MIR-130A, MIR-301, MIR-130B                                                | -2.13 | 2.41E-3     | 6.77E-3        |
| Targets of microRNA TGCACTT, MIR-519C, MIR-519B, MIR-519A                                               | -2.12 | 2.02E-3     | 7.32E-3        |
| Targets of microRNA ACTTTAT, MIR-142-5P                                                                 | -2.07 | 3.23E-3     | 9.61E-3        |
| Genes involved in brain microRNA biogenesis in mouse model of schizophrenia                             | 3.07  | <2.00E-4    | 0.00           |
| <b><i>Immune system related</i></b>                                                                     |       |             |                |
| Genes up-regulated in polymorphonuclear leukocytes after <i>Francisella tularensis</i> vaccine in human | -2.58 | <2.00E-4    | 6.66E-4        |
| Genes involved in cytokine signaling in the immune system                                               | -2.46 | 3.99E-4     | 1.14E-3        |
| Genes involved in the innate immune system                                                              | -2.44 | <2.00E-4    | 1.20E-3        |

NES: normalized enrichment score. FDR: false discovery rate

**Supplementary Table 2:** list A of 138 mRNA that are potential targets of the miR-3130-5p at target score  $\geq 60$

| Target Rank | Target Score | miRNA Name      | Gene ID | Gene Symbol | Transcript Accession |
|-------------|--------------|-----------------|---------|-------------|----------------------|
| 1           | 97           | hsa-miR-3130-5p | 23608   | MKRN1       | NM_013446            |
| 2           | 96           | hsa-miR-3130-5p | 51062   | ATL1        | NM_181598            |
| 3           | 96           | hsa-miR-3130-5p | 5495    | PPM1B       | NM_177969            |
| 4           | 95           | hsa-miR-3130-5p | 79183   | TTPAL       | NM_001039199         |
| 5           | 95           | hsa-miR-3130-5p | 2045    | EPHA7       | NM_004440            |
| 6           | 94           | hsa-miR-3130-5p | 80351   | TNKS2       | NM_025235            |
| 7           | 94           | hsa-miR-3130-5p | 3839    | KPNA3       | NM_002267            |
| 8           | 93           | hsa-miR-3130-5p | 80856   | KIAA1715    | NM_030650            |
| 9           | 93           | hsa-miR-3130-5p | 7468    | WHSC1       | NM_133331            |
| 10          | 91           | hsa-miR-3130-5p | 41      | ASIC1       | NM_020039            |
| 11          | 91           | hsa-miR-3130-5p | 51552   | RAB14       | NM_016322            |
| 12          | 89           | hsa-miR-3130-5p | 1184    | CLCN5       | NM_001282163         |
| 13          | 89           | hsa-miR-3130-5p | 57135   | DAZ4        | NM_020420            |
| 14          | 89           | hsa-miR-3130-5p | 57054   | DAZ3        | NM_020364            |
| 15          | 89           | hsa-miR-3130-5p | 57055   | DAZ2        | NM_001005786         |
| 16          | 89           | hsa-miR-3130-5p | 1617    | DAZ1        | NM_004081            |
| 17          | 88           | hsa-miR-3130-5p | 284615  | ANKRD34A    | NM_001039888         |
| 18          | 88           | hsa-miR-3130-5p | 7750    | ZMYM2       | NM_003453            |
| 19          | 88           | hsa-miR-3130-5p | 51542   | VPS54       | NM_001005739         |
| 20          | 88           | hsa-miR-3130-5p | 401265  | KLHL31      | NM_001003760         |
| 21          | 87           | hsa-miR-3130-5p | 83897   | KRTAP3-2    | NM_031959            |
| 22          | 87           | hsa-miR-3130-5p | 84920   | ALG10       | NM_032834            |
| 23          | 87           | hsa-miR-3130-5p | 56172   | ANKH        | NM_054027            |
| 24          | 87           | hsa-miR-3130-5p | 129881  | CCDC173     | NM_001085447         |
| 25          | 86           | hsa-miR-3130-5p | 10166   | SLC25A15    | NM_014252            |
| 26          | 86           | hsa-miR-3130-5p | 5007    | OSBP        | NM_002556            |
| 27          | 85           | hsa-miR-3130-5p | 60526   | C2orf43     | NM_021925            |
| 28          | 85           | hsa-miR-3130-5p | 6879    | TAF7        | NM_005642            |
| 29          | 85           | hsa-miR-3130-5p | 54764   | ZRANB1      | NM_017580            |
| 30          | 85           | hsa-miR-3130-5p | 57700   | FAM160B1    | NM_020940            |
| 31          | 85           | hsa-miR-3130-5p | 22858   | ICK         | NM_016513            |
| 32          | 84           | hsa-miR-3130-5p | 9705    | ST18        | NM_014682            |
| 33          | 84           | hsa-miR-3130-5p | 54700   | RRN3        | NM_018427            |
| 34          | 83           | hsa-miR-3130-5p | 83394   | PITPNM3     | NM_001165966         |
| 35          | 83           | hsa-miR-3130-5p | 3171    | FOXA3       | NM_004497            |
| 36          | 83           | hsa-miR-3130-5p | 3916    | LAMP1       | NM_005561            |
| 37          | 83           | hsa-miR-3130-5p | 63894   | VIPAS39     | NM_022067            |
| 38          | 83           | hsa-miR-3130-5p | 66008   | TRAK2       | NM_015049            |
| 39          | 83           | hsa-miR-3130-5p | 5887    | RAD23B      | NM_001244724         |

|    |    |                 |           |              |              |
|----|----|-----------------|-----------|--------------|--------------|
| 40 | 83 | hsa-miR-3130-5p | 56829     | ZC3HAV1      | NM_020119    |
| 41 | 82 | hsa-miR-3130-5p | 55041     | PLEKHB2      | NM_001267065 |
| 42 | 82 | hsa-miR-3130-5p | 29933     | GPR132       | NM_001278694 |
| 43 | 81 | hsa-miR-3130-5p | 143384    | CACUL1       | NM_153810    |
| 44 | 81 | hsa-miR-3130-5p | 151050    | KANSL1L      | NM_152519    |
| 45 | 81 | hsa-miR-3130-5p | 5420      | PODXL        | NM_001018111 |
| 46 | 80 | hsa-miR-3130-5p | 93986     | FOXP2        | NM_148898    |
| 47 | 80 | hsa-miR-3130-5p | 80830     | APOL6        | NM_030641    |
| 48 | 79 | hsa-miR-3130-5p | 80335     | WDR82        | NM_025222    |
| 49 | 79 | hsa-miR-3130-5p | 253635    | GPATCH11     | NM_174931    |
| 50 | 79 | hsa-miR-3130-5p | 4613      | MYCN         | NM_005378    |
| 51 | 79 | hsa-miR-3130-5p | 51104     | ABHD17B      | NM_001025780 |
| 52 | 79 | hsa-miR-3130-5p | 6323      | SCN1A        | NM_006920    |
| 53 | 79 | hsa-miR-3130-5p | 6932      | TCF7         | NM_201634    |
| 54 | 78 | hsa-miR-3130-5p | 2900      | GRIK4        | NM_001282470 |
| 55 | 78 | hsa-miR-3130-5p | 348110    | C15orf38     | NM_182616    |
| 56 | 78 | hsa-miR-3130-5p | 57489     | ODF2L        | NM_001184766 |
| 57 | 78 | hsa-miR-3130-5p | 51473     | DCDC2        | NM_001195610 |
| 58 | 78 | hsa-miR-3130-5p | 8322      | FZD4         | NM_012193    |
| 59 | 78 | hsa-miR-3130-5p | 113201    | CASC4        | NM_138423    |
| 60 | 77 | hsa-miR-3130-5p | 51163     | DBR1         | NM_016216    |
| 61 | 77 | hsa-miR-3130-5p | 355       | FAS          | NM_152871    |
| 62 | 76 | hsa-miR-3130-5p | 140739    | UBE2F        | NM_001278308 |
| 63 | 76 | hsa-miR-3130-5p | 7516      | XRCC2        | NM_005431    |
| 64 | 76 | hsa-miR-3130-5p | 100101467 | ZSCAN30      | NM_001288711 |
| 65 | 75 | hsa-miR-3130-5p | 89795     | NAV3         | NM_014903    |
| 66 | 75 | hsa-miR-3130-5p | 85013     | TMEM128      | NM_032927    |
| 67 | 75 | hsa-miR-3130-5p | 26046     | LTN1         | NM_015565    |
| 68 | 75 | hsa-miR-3130-5p | 339500    | ZNF678       | NM_178549    |
| 69 | 75 | hsa-miR-3130-5p | 6672      | SP100        | NM_003113    |
| 70 | 74 | hsa-miR-3130-5p | 56889     | TM9SF3       | NM_020123    |
| 71 | 74 | hsa-miR-3130-5p | 6605      | SMARCE1      | NM_003079    |
| 72 | 74 | hsa-miR-3130-5p | 891       | CCNB1        | NM_031966    |
| 73 | 73 | hsa-miR-3130-5p | 115350    | FCRL1        | NM_001159398 |
| 74 | 73 | hsa-miR-3130-5p | 83445     | GSG1         | NM_001206843 |
| 75 | 73 | hsa-miR-3130-5p | 54883     | CWC25        | NM_017748    |
| 76 | 73 | hsa-miR-3130-5p | 8445      | DYRK2        | NM_006482    |
| 77 | 72 | hsa-miR-3130-5p | 445571    | CBWD3        | NM_201453    |
| 78 | 72 | hsa-miR-3130-5p | 101060578 | LOC101060578 | XM_006726501 |
| 79 | 72 | hsa-miR-3130-5p | 644019    | CBWD6        | NM_001085457 |
| 80 | 72 | hsa-miR-3130-5p | 374928    | ZNF773       | NM_198542    |
| 81 | 72 | hsa-miR-3130-5p | 8464      | SUPT3H       | NM_181356    |
| 82 | 72 | hsa-miR-3130-5p | 5565      | PRKAB2       | NM_005399    |

|     |    |                 |           |              |              |
|-----|----|-----------------|-----------|--------------|--------------|
| 83  | 72 | hsa-miR-3130-5p | 79085     | SLC25A23     | NM_024103    |
| 84  | 72 | hsa-miR-3130-5p | 55871     | CBWD1        | NM_001145355 |
| 85  | 72 | hsa-miR-3130-5p | 6096      | RORB         | NM_006914    |
| 86  | 72 | hsa-miR-3130-5p | 150472    | CBWD2        | NM_172003    |
| 87  | 72 | hsa-miR-3130-5p | 220869    | CBWD5        | NM_001286836 |
| 88  | 71 | hsa-miR-3130-5p | 246243    | RNASEH1      | NM_001286834 |
| 89  | 71 | hsa-miR-3130-5p | 84285     | EIF1AD       | NM_032325    |
| 90  | 71 | hsa-miR-3130-5p | 488       | ATP2A2       | NM_170665    |
| 91  | 71 | hsa-miR-3130-5p | 6480      | ST6GAL1      | NM_003032    |
| 92  | 70 | hsa-miR-3130-5p | 5229      | PGGT1B       | NM_005023    |
| 93  | 70 | hsa-miR-3130-5p | 26065     | LSM14A       | NM_015578    |
| 94  | 69 | hsa-miR-3130-5p | 6492      | SIM1         | NM_005068    |
| 95  | 69 | hsa-miR-3130-5p | 55660     | PRPF40A      | NM_017892    |
| 96  | 69 | hsa-miR-3130-5p | 51318     | MRPL35       | NM_145644    |
| 97  | 69 | hsa-miR-3130-5p | 30000     | TNPO2        | NM_001136196 |
| 98  | 69 | hsa-miR-3130-5p | 1016      | CDH18        | NM_001167667 |
| 99  | 68 | hsa-miR-3130-5p | 7257      | TSNAX        | NM_005999    |
| 100 | 68 | hsa-miR-3130-5p | 115509    | ZNF689       | NM_138447    |
| 101 | 68 | hsa-miR-3130-5p | 3038      | HAS3         | NM_005329    |
| 102 | 68 | hsa-miR-3130-5p | 9750      | FAM65B       | NM_014722    |
| 103 | 67 | hsa-miR-3130-5p | 1562      | CYP2C18      | NM_000772    |
| 104 | 67 | hsa-miR-3130-5p | 3329      | HSPD1        | NM_002156    |
| 105 | 67 | hsa-miR-3130-5p | 5000      | ORC4         | NM_001190879 |
| 106 | 66 | hsa-miR-3130-5p | 101927658 | GOLGA6L20    | NM_001282503 |
| 107 | 66 | hsa-miR-3130-5p | 116443    | GRIN3A       | NM_133445    |
| 108 | 66 | hsa-miR-3130-5p | 79691     | QTRTD1       | NM_024638    |
| 109 | 66 | hsa-miR-3130-5p | 255967    | PAN3         | NM_175854    |
| 110 | 66 | hsa-miR-3130-5p | 4188      | MDFI         | NM_005586    |
| 111 | 66 | hsa-miR-3130-5p | 54848     | ARHGEF38     | NM_001242729 |
| 112 | 66 | hsa-miR-3130-5p | 112885    | PHF21B       | NM_001284296 |
| 113 | 66 | hsa-miR-3130-5p | 25992     | SNED1        | NM_001080437 |
| 114 | 66 | hsa-miR-3130-5p | 101929748 | LOC101929748 | XM_005252330 |
| 115 | 65 | hsa-miR-3130-5p | 25769     | SLC24A2      | NM_020344    |
| 116 | 65 | hsa-miR-3130-5p | 26091     | HERC4        | NM_001278187 |
| 117 | 65 | hsa-miR-3130-5p | 55751     | TMEM184C     | NM_018241    |
| 118 | 64 | hsa-miR-3130-5p | 635       | BHMT         | NM_001713    |
| 119 | 63 | hsa-miR-3130-5p | 55553     | SOX6         | NM_001145819 |
| 120 | 63 | hsa-miR-3130-5p | 23509     | POFUT1       | NM_015352    |
| 121 | 63 | hsa-miR-3130-5p | 55729     | ATF7IP       | NM_001286515 |
| 122 | 63 | hsa-miR-3130-5p | 79944     | L2HGDH       | NM_024884    |
| 123 | 63 | hsa-miR-3130-5p | 79727     | LIN28A       | NM_024674    |
| 124 | 63 | hsa-miR-3130-5p | 144165    | PRICKLE1     | NM_001144883 |
| 125 | 62 | hsa-miR-3130-5p | 56675     | NRIP3        | NM_020645    |

|     |    |                 |        |        |              |
|-----|----|-----------------|--------|--------|--------------|
| 126 | 62 | hsa-miR-3130-5p | 10217  | CTDSPL | NM_001008392 |
| 127 | 62 | hsa-miR-3130-5p | 7248   | TSC1   | NM_001162426 |
| 128 | 62 | hsa-miR-3130-5p | 64399  | HHIP   | NM_022475    |
| 129 | 62 | hsa-miR-3130-5p | 57690  | TNRC6C | NM_001142640 |
| 130 | 61 | hsa-miR-3130-5p | 63934  | ZNF667 | NM_022103    |
| 131 | 61 | hsa-miR-3130-5p | 84466  | MEGF10 | NM_001256545 |
| 132 | 61 | hsa-miR-3130-5p | 84522  | JAGN1  | NM_032492    |
| 133 | 61 | hsa-miR-3130-5p | 78990  | OTUB2  | NM_023112    |
| 134 | 61 | hsa-miR-3130-5p | 7068   | THRB   | NM_000461    |
| 135 | 61 | hsa-miR-3130-5p | 10521  | DDX17  | NM_001098504 |
| 136 | 60 | hsa-miR-3130-5p | 26115  | TANC2  | NM_025185    |
| 137 | 60 | hsa-miR-3130-5p | 3551   | IKBKB  | NM_001242778 |
| 138 | 60 | hsa-miR-3130-5p | 200424 | TET3   | NM_001287491 |

**Supplementary Table 3:** list B of 59 up-regulated genes in the cases of PTSD&Dep versus controls in the genome-wide differential gene expression analysis in the GTP Discovery Sample

| <b>SYMBOL</b> | <b>p-value</b> | <b>Adjusted p-value</b> |
|---------------|----------------|-------------------------|
| MRPS23        | 7.92486E-07    | 0.010340357             |
| PDCD5         | 1.8437E-05     | 0.040595188             |
| ERH           | 3.04734E-05    | 0.051649423             |
| LRRC26        | 3.33504E-05    | 0.051649423             |
| NOLA1         | 5.53596E-05    | 0.051649423             |
| MRPS21        | 6.846E-05      | 0.051649423             |
| SOD1          | 6.99802E-05    | 0.051649423             |
| MRPS33        | 7.21617E-05    | 0.051649423             |
| SHFM1         | 8.7101E-05     | 0.051649423             |
| MT1X          | 8.72991E-05    | 0.051649423             |
| RPLP2         | 8.89429E-05    | 0.051649423             |
| ZNHIT3        | 9.13557E-05    | 0.051649423             |
| UQCRH         | 0.000109654    | 0.057230858             |
| C11orf1       | 0.000140607    | 0.062871718             |
| GTF2H5        | 0.000153176    | 0.062871718             |
| ZNF428        | 0.000154096    | 0.062871718             |
| NDUFS5        | 0.000154294    | 0.062871718             |
| RPL39         | 0.00015901     | 0.062871718             |
| MGST3         | 0.000169051    | 0.063022163             |
| RPS27L        | 0.000237385    | 0.069378545             |
| PEBP1         | 0.000253017    | 0.069378545             |
| MIF           | 0.000260171    | 0.069378545             |
| RPL14         | 0.000291056    | 0.073032746             |
| LSMD1         | 0.000304697    | 0.073623938             |
| C14orf156     | 0.000333695    | 0.076363611             |
| SEC61G        | 0.000348406    | 0.076363611             |
| GTF3C6        | 0.00036031     | 0.076923573             |
| PSMD14        | 0.000375045    | 0.076923573             |
| RPS24         | 0.000387699    | 0.077078404             |
| RPL32         | 0.000389882    | 0.077078404             |
| CETN3         | 0.000403223    | 0.078293893             |
| RPL26         | 0.000414031    | 0.078293893             |
| C12orf62      | 0.000422252    | 0.078707828             |
| RPL31         | 0.000516308    | 0.087772112             |
| TRMT112       | 0.000524861    | 0.087772112             |
| RPL41         | 0.000543672    | 0.087772112             |
| NDUFA4        | 0.000545275    | 0.087772112             |
| RPL37A        | 0.000560956    | 0.088184919             |
| BOLA3         | 0.000570763    | 0.088658588             |

|          |             |             |
|----------|-------------|-------------|
| HAX1     | 0.000605024 | 0.088881323 |
| RPL21    | 0.000621728 | 0.089146195 |
| SHFM1    | 0.000636678 | 0.089518272 |
| MRPL43   | 0.000644905 | 0.089518272 |
| PHPT1    | 0.000667939 | 0.091739655 |
| RPAIN    | 0.000697309 | 0.091911433 |
| C19orf70 | 0.00070187  | 0.091911433 |
| CKS2     | 0.000726862 | 0.091911433 |
| NDUFA3   | 0.000738121 | 0.091911433 |
| HAX1     | 0.000758281 | 0.091911433 |
| TOMM7    | 0.000766703 | 0.091911433 |
| MRPL35   | 0.000779956 | 0.091911433 |
| RPL36    | 0.000791672 | 0.091911433 |
| PFDN5    | 0.000813296 | 0.092462082 |
| PRICKLE4 | 0.000814925 | 0.092462082 |
| C19orf53 | 0.000863187 | 0.094731596 |
| MRPS18C  | 0.000942448 | 0.098530398 |
| SNRPF    | 0.000944286 | 0.098530398 |
| RAP2A    | 0.00095858  | 0.098530398 |
| UBE2T    | 0.000959025 | 0.098530398 |
